## **Physical behaviours and their association with type 2 diabetes risk in urban South African middle-aged adults: An isotemporal substitution approach**

Clement N. Kufe<sup>1§</sup>, Julia H. Goedecke<sup>1,2</sup>, Maphoko Masemola<sup>1</sup>, Tinashe Chikowore<sup>1</sup>, Melikhaya Soboyisi<sup>1</sup>, Antonia Smith<sup>3</sup>, Kate Westgate<sup>3</sup>, Soren Brage<sup>3</sup>, Lisa K. Micklesfield<sup>1</sup>

### **Author's affiliations:**

<sup>1</sup>South African Medical Research Council/WITS Developmental Pathways for Health Research Unit (DPHRU), Department of Paediatrics, Faculty of Health Sciences, University of the Witwatersrand, Johannesburg, South Africa

<sup>2</sup>Non-Communicable Diseases Research Unit, South African Medical Research Council, Cape Town, South Africa

<sup>3</sup>MRC Epidemiology Unit, University of Cambridge, Cambridge, CB2 0SL, United Kingdom

## **Running title: Physical behaviours and their association with type 2 diabetes risk**

<sup>§</sup> Corresponding author

Clement Nyuyki Kufe

SAMRC/Wits Developmental Pathways for Health Research Unit,

Department of Paediatrics,

School of Clinical Medicine,

Faculty of Health Sciences,

University of the Witwatersrand, Johannesburg, South Africa

Phone: +27 63 092 6943

E-mail: [klekufe@gmail.com](mailto:klekufe@gmail.com)

### **Email addresses:**

CNK: [klekufe@gmail.com](mailto:klekufe@gmail.com)

JHG: [julia.goedecke@mrc.ac.za](mailto:julia.goedecke@mrc.ac.za)

MM: [maphokomasemola@gmail.com](mailto:maphokomasemola@gmail.com)

TC: [tinashedoc@gmail.com](mailto:tinashedoc@gmail.com)

MS: [melikhaya.soboyisi@gmail.com](mailto:melikhaya.soboyisi@gmail.com)

AS: [antonia.smith@mrc-epid.cam.ac.uk](mailto:antonia.smith@mrc-epid.cam.ac.uk)

KW: [kate.westgate@mrc-epid.cam.ac.uk](mailto:kate.westgate@mrc-epid.cam.ac.uk)

SB: [soren.brage@mrc-epid.cam.ac.uk](mailto:soren.brage@mrc-epid.cam.ac.uk)

LKM: [lisa.micklesfield@wits.ac.za](mailto:lisa.micklesfield@wits.ac.za)

## Abstract

**Introduction:** To examine the associations between physical behaviours and type 2 diabetes mellitus (T2DM) risk in middle-aged South African men and women.

**Research design and methods:** This cross-sectional study included middle-aged men (n=403; age: median [IQR], 53.0 [47.8–58.8] years) and women (n=324; 53.4 [49.1–58.1] years) from Soweto, South Africa. Total movement volume (average movement in milli-g) and time (minutes/day) spent in different physical behaviours, including awake sitting/lying, standing, light intensity physical activity (LPA) and moderate-to-vigorous intensity physical activity (MVPA), were determined by combining the signals from two triaxial accelerometers worn simultaneously on the hip and thigh. All participants completed an oral glucose tolerance test, from which indicators of diabetes risk were derived. Associations between physical behaviours and T2DM risk were adjusted for sociodemographic factors and body composition.

**Results:** Total movement volume was inversely associated with measures of fasting and 2-h glucose and directly associated with insulin sensitivity, basal insulin clearance, beta-cell function, but these associations were not independent of fat mass, except for basal insulin clearance in women. In men, replacing 30 minutes of sitting/lying, standing or LPA with the same amount of MVPA time was associated with 1.2–1.4 mmol/L lower fasting glucose and 12.3–13.4 mgI<sup>2</sup>/mUmin higher insulin sensitivity. In women, substituting sitting/lying with the same amount of standing time or LPA was associated with 0.5–0.8 mmol/L lower fasting glucose. Substituting 30 minutes sitting/lying with the same amount of standing time was also

associated with 3.2 mgI<sup>2</sup>/mUmin higher insulin sensitivity, and substituting 30 minutes of sitting/lying, standing or LPA with the same amount of MVPA time was associated with 0.25-0.29 ng/mIU higher basal insulin clearance in women.

**Conclusion:** MVPA is important in reducing T2DM risk in men and women but LPA appears to be important in women only. Recommendations for PA may differ by sex.

**Keywords:** sitting/lying, standing, light physical activity, moderate-to-vigorous physical activity, isothermal substitution, diabetes risk. (**Abstract word count: 300**)

(**Article word count: 3988, References: 50**)

## 1 **Introduction**

2 The prevalence of type 2 diabetes mellitus (T2DM) is increasing globally and sub-Saharan  
3 Africa (SSA) is projected to have the greatest estimated increase compared to all other regions  
4 by 2045 (1). Within SSA, South Africa (SA) has the highest prevalence of T2DM, with the  
5 latest national prevalence for adult men and women at 8% and 13%, respectively (2).  
6 Extensive evidence reports an inverse association between physical activity (PA) and T2DM  
7 risk (3–5). Studies have shown that physical activity of any intensity positively influences  
8 glucose regulation and insulin sensitivity in a dose–response manner (6,7).

9  
10 Sedentary time is also recognised as a risk factor for T2DM with a systematic review and  
11 meta-analysis showing that participants who reported the greatest sedentary time were at a  
12 112% higher relative risk (RR) of T2DM compared to those with the lowest sedentary time  
13 (8). While some studies have shown this association to be independent of physical activity  
14 (9), a meta-analysis by Patterson et al., showed an increased risk for T2DM with higher levels  
15 of total sitting independent of PA (10).

16  
17 Time spent in sedentary behaviour, PA and sleep are mutually exclusive and the total minutes  
18 available in a day are fixed and finite. Therefore, understanding the beneficial effects of  
19 physical activity depend not only on the considered aspect of PA but also on the activity type  
20 displaced (11). A recent meta-analysis reported that replacing 30 minutes of sedentary time  
21 with the same amount of time in light intensity physical activity (LPA) was associated with  
22 reductions in fasting insulin, waist circumference and all-cause mortality, and replacing  
23 sedentary time with moderate-to-vigorous intensity physical activity (MVPA) was associated

24 with reductions in body mass index (BMI), waist circumference, fasting glucose and insulin  
25 concentrations, and all-cause mortality (12). Further, results from the UK Biobank study (n=  
26 475,502) reported that replacing sedentary behaviour with 30 minutes/day of physical  
27 activities or structured exercise was associated with a 6–31% lower incidence of T2DM 11  
28 years later (13). Isotemporal substitution analysis simultaneously models a specific activity  
29 and the effects of time in substitution of the activity by another for the same amount of time  
30 (14).

31  
32 A South African population-based survey reported that only 14.8% were moderately  
33 physically active and 27.8% were vigorously physically active, and that men were more likely  
34 to be physically active whereby women were less likely to engage in moderate as well as  
35 vigorous PA (15). Few South African studies have explored the association between physical  
36 behaviours and T2DM risk (16–21). Globally, the majority of evidence reporting the  
37 association between PA and health outcomes is based on self-reported PA which has several  
38 limitations (22). Wearable devices are increasingly being used and provide a more accurate,  
39 objective assessment of sedentary behaviour and PA intensity and volume than subjective  
40 self-reported measures (23,24). Edwardson et al., have shown that high accuracy can be  
41 obtained using two wearable devices with postural categorization from an accelerometer on  
42 the thigh, and intensity also using information from an accelerometer on the waist (25).

43  
44 There is controversy as to whether the association between PA and T2DM risk is mediated or  
45 independent of adiposity (4). This is relevant to the South African context where there is a

46 high prevalence of obesity and where adiposity differs significantly between men and women  
47 (2).

48

49 The aim of this study is therefore to examine the association between physical behaviours  
50 quantified by combining signals from two accelerometers, and risk for T2DM in middle-aged  
51 men and women from urban South Africa.

52

### 53 **Materials and methods**

#### 54 **Research design, setting and participants**

55 This cross-sectional study used data from the Middle-aged Soweto Cohort (MASC) collected  
56 between January 2017 and August 2018 (502 men and 527 women), as described previously  
57 (26). For this analysis, complete accelerometry (27) and oral glucose tolerance test (OGTT)  
58 data were available on 727 participants (n=403 men and n=324 women) (Figure 1).

59

60 Ethical approval was granted by the Human Research Ethics Committee (HREC) Medical  
61 (M160604 and M160975) of the University of the Witwatersrand, Johannesburg, South  
62 Africa. All study procedures and possible risks were explained to participants who consented  
63 and signed the informed consent form prior to inclusion in the study. Data collection took  
64 place in accordance with the guidelines of Helsinki at the South African Medical Research  
65 Council/University of the Witwatersrand Developmental Pathways for Health Research Unit,  
66 Chris Hani Baragwanath Hospital in Soweto, Johannesburg, South Africa.

67

#### 68 **Procedures**

## 69 **Physical behaviour assessment and data processing**

70 Physical behaviours were objectively measured using two accelerometers, an ActiGraph  
71 GT3X+ (AG) (ActiGraph, Pensacola, USA) on the right hip, and an activPAL (AP) (PAL  
72 technologies Ltd., Glasgow, UK) on the right thigh. The participants were advised to wear the  
73 accelerometers continuously for seven days and nights including sleep times and the  
74 weekend, and only to remove the ActiGraph GT3X+ during bathing or water-based activities.  
75 They were also requested to continue with their normal daily activities. Participants received a  
76 sleep diary and were asked to record their daily sleep and wake times for the same period.

77  
78 At the end of the seven days, participants returned the accelerometers and raw data was  
79 downloaded using the Actilife software (ActiGraph, Pensacola, USA) and actiPAL software  
80 (PAL Technologies Ltd., Glasgow, UK). Complete data from ActiGraph GT3X+ and  
81 activPAL for four to seven days was obtained by a combination of processing scripts  
82 (PAMPRO) and post-processing scripts (28). The raw tri-axial signals from the two  
83 accelerometers were calibrated to local gravity (29) and acceleration and pitch angles  
84 converted to minute-by-minute time series. The signals were combined with the self-reported  
85 sleep times and reported at participant level to estimate total volume and time spent in  
86 postures and intensities of behaviours. The behaviour outcomes were summarised as total  
87 movement volume (Euclidian norm minus one, ENMO expressed as milli-g (mg)), time spent  
88 in sleep, and awake time in sitting/lying, standing, LPA, and MVPA, all in minutes per day  
89 (min/day). Details of the objectively measured PA data acquisition, processing, development  
90 of the algorithm and classification are described elsewhere (27).

91



92 **Measures of type 2 diabetes risk**

93 From each participant, blood samples were drawn after an overnight fast for determination of  
94 plasma glucose, serum insulin, C-peptide, and glycated haemoglobin (HbA1c). Participants  
95 then underwent a standard oral glucose tolerance test (OGTT). Participants ingested 75g  
96 anhydrous glucose in 250ml water and then 5ml blood samples were drawn every 30 minutes  
97 for 2 hours. Randox RX Daytona Chemistry Analyser (Randox Laboratories Ltd., London,  
98 UK) was used to measure plasma glucose concentrations and D-10<sup>TM</sup> Haemoglobin Analyser  
99 (Bio-Rad Laboratories, Inc. USA) was used to measure HbA1c concentrations. Immulite®  
100 1000 Immunoassay System (Siemens Healthcare Diagnostics, Tarrytown, NY) was used to  
101 measure serum insulin and C-peptide concentrations.

102

103 The homeostasis model assessment (HOMA-IR) was used to estimate fasting insulin  
104 resistance (30). Insulin sensitivity was estimated by the Matsuda Index for participants with  
105 complete OGTT results, and the composite insulin sensitivity index for those with data at 0  
106 and 120 minutes (31,32). Insulin secretion was calculated as the C-peptide index, which was  
107 the ratio of the increment in C-peptide to glucose during the first 30 minutes of the OGTT.  
108 The oral disposition index (oDI), an estimate of beta-cell function, was calculated as a product  
109 of C-peptide index and Matsuda index (33). Basal insulin clearance were estimated as fasting  
110 C-peptide/insulin concentrations, and postprandial insulin clearance was estimated from the  
111 incremental area under the curve (iAUC) of C-peptide to iAUC insulin using the trapezoidal  
112 method.

113

114

115 Questionnaires were completed on Research Electronic Data Capture (REDCap) (34) and  
116 included data on age, marital status (married/unmarried), highest level of education attained  
117 (no formal schooling/elementary school, secondary school, and tertiary education), 12 item  
118 household assets classified into 3 categories (0-4 for category 1, 5-8 for category 2 and 9-12  
119 for category 3) and employment status (employed/not employed).

120

### 121 **Anthropometry and body composition**

122 Weight was measured with a TANITA digital scale (model: TBF-410, TANITA Corporation,  
123 US) to the nearest 0.1 kg. Height was measured with a wall-mounted stadiometer (Holtain,  
124 UK) to the nearest 0.1 cm. Body mass index (BMI) was calculated as weight (kg)/(height in  
125 m)<sup>2</sup>. Sub-total fat mass (FM, kg) (total fat mass minus the head) was measured with a Hologic  
126 QDR 4500A dual-energy x-ray absorptiometry (DXA) machine (Hologic Inc., Bedford,  
127 USA) and analysed with APEX software version 13.4.2.3 according to standard procedures.  
128 Fat mass index (FMI) was calculated as sub-total fat mass (kg)/height<sup>2</sup> (m<sup>2</sup>). Abdominal  
129 visceral adipose tissue (VAT) and subcutaneous adipose tissue (SAT) areas were estimated  
130 from DXA, as described elsewhere (35).

131

### 132 **HIV/AIDS tests**

133 Pre- and post-HIV counselling was provided and an HIV antibody test, Wondfo® One Step  
134 HIV-1/2 Whole Blood/Serum/Plasma: Test 2 lines (Guanghu Wondfo Biotech Co., Ltd) was  
135 completed for all consented participants, except those previously known as HIV positive.  
136 Newly diagnosed HIV positive participants were referred to an HIV clinic for follow up and

137 retained in the study. Participants were subsequently categorised into HIV negative (HIV-) or  
138 HIV positive (HIV+).

139

#### 140 **Statistical analysis**

141 Data was analysed using Stata 15.1/IC (StataCorp, College Station, TX, USA). Shapiro-Wilk  
142 test and Q-Q probability plots were used to assess distribution and ascertain skewness and  
143 kurtosis of the data. Variables were summarised as count (percentages) for categorical data,  
144 mean (standard deviation) if normally distributed continuous data, and median (25th–75th  
145 percentiles) if not normally distributed continuous data. Student’s t-tests were used to explore  
146 the sex differences for normally distributed continuous data, and Mann-Whitney U and  
147 Kruskal-Wallis tests were used to compare skewed continuous data. Multivariable robust  
148 regression analyses were used to explore the relationship between total movement volume and  
149 outcome variables (fasting and 2-hr glucose, insulin sensitivity, basal insulin clearance, and  
150 beta-cell function). In model 1, age was included as a covariate, in model 2; age, HIV status,  
151 education, asset category and employment were included as covariates; in model 3, FMI was  
152 added to covariates in model 2; while in model 4, VAT was included with the covariates from  
153 model 3.

154

155 Isotemporal substitution modelling was used to estimate the effect of replacing time spent in  
156 one physical behaviour (sleep, sitting/lying, standing, LPA and MVPA) with another;  
157 specifically we ascertained the theoretical effect of reallocating 30 minutes of one physical  
158 behaviour to 30 minutes of another physical behaviour on the glucose and insulin measures  
159 listed above. Regression coefficients (and 95%CI) represent the replacement of one physical

160 behaviour with another, while other behaviours remain constant for the same time.  
161 Isotemporal substitution models were adjusted for age, HIV status, education, asset category  
162 and employment (model 2 in total movement volume robust regression analyses). Due to  
163 marked differences in levels of PA and adiposity between men and women (Table 1), all  
164 analyses were stratified by sex. A p-value of  $<0.05$  was considered significant and 95% CI  
165 stated.

166

167

## 168 **Results**

### 169 **Sample characteristics**

170 Physical behaviours, body fat, and measures of glycaemia and insulin dynamics for the whole  
171 sample, and men and women separately, are presented in Table 1. Men and women were of  
172 similar age (~53 years) and a similar proportion were living with HIV (21.1% vs. 19.8%,  
173  $p=0.657$ ). Women had higher BMI and DXA-derived measures of fat mass, FMI, VAT and  
174 SAT than men (all  $p<0.001$ ).

175

176 There were no sex differences in LPA or sleep time, but men had higher total movement  
177 volume (mg) and spent more time in MVPA than women (both  $p<0.001$ ). Men spent more  
178 time sitting/lying and less time standing than women (both  $p<0.001$ ). There were no sex  
179 differences in fasting or 2-hour glucose, while all the measures of insulin dynamics were  
180 different between the sexes, with women having higher HOMA-IR, insulin secretion and  
181 beta-cell function, and lower insulin sensitivity and basal insulin clearance than men.

182

183 **Associations between total movement volume and measures of glycaemia and insulin**  
184 **dynamics**

185 In men and women, total movement volume was inversely associated with fasting glucose and  
186 positively associated with insulin sensitivity in models adjusted for age, HIV status and SES  
187 (Table 2). After adjusting for FMI and VAT these associations were no longer significant. In  
188 men only, total movement volume was also inversely associated with 2-h glucose, but after  
189 adjusting for FMI and VAT this association was no longer significant. In women only, total  
190 movement volume was also significantly associated with basal insulin clearance, and this  
191 remained significant when adjusting for FMI and VAT. There was no association between  
192 total movement volume and beta-cell function in either men or women.

193

194 **Isotemporal substitution of physical behaviours in men**

195 Replacing 30 minutes of sitting/lying, standing or LPA with 30 minutes of MVPA was  
196 associated with 1.2–1.4 mmol/L lower fasting glucose and 12.3–13.4 mgI<sup>2</sup>/mUmin higher  
197 insulin sensitivity in men (Table 3 and 4). Replacing 30 minutes of sitting/lying with the same  
198 amount of time standing or in MVPA was associated with 1.4 mmol/L and 3.3 mmol/L lower  
199 2-hour glucose, respectively. Although replacing 30 minutes of LPA with the same amount of  
200 time in MVPA was associated with 3.5 mmol/L lower 2-hour glucose, it was also associated  
201 with 1.6 mmol/L lower 2-hour glucose when replaced by standing. Replacing 30 minutes of  
202 sitting/lying and LPA with the same amount of time in MVPA was associated with 17  
203 mIU/mmol and 19.1 mIU/mmol higher beta-cell function, respectively. Replacing physical  
204 behaviours was not associated with basal insulin clearance in men.

205

206 After adjusting for FMI, the associations between physical behaviours and fasting glucose,  
207 insulin sensitivity, and beta-cell function were no longer significant (data not shown).  
208 However, replacing 30 minutes of sitting/lying with 30 minutes of standing time (1.3 mmol/L,  
209 CI: 0.4–2.2,  $p=0.003$ ) and replacing 30 minutes of standing with the same amount of LPA  
210 time (1.7 mmol/L, CI: 0.4–3.0,  $p=0.007$ ) both remained significantly associated with 2-hour  
211 glucose after adjusting for FMI.

212

### 213 **Isotemporal substitution of physical behaviours in women**

214 Replacing 30 minutes of sitting/lying with standing or LPA were associated with 0.5 mmol/L  
215 and 0.8 mmol/L lower fasting glucose, respectively, but were not associated with 2-hour  
216 glucose. Replacing 30 minutes of sitting/lying with the same amount of time standing was  
217 associated with 3.2  $\text{mg}^2/\text{mUmin}$  higher insulin sensitivity, 0.05 ng/mIU higher basal insulin  
218 clearance, and 11.3 mIU/mmol higher beta-cell function. Replacing 30 minutes of  
219 sitting/lying or standing or LPA with the same amount of time in MVPA was associated with  
220 0.25–0.30 ng/mIU higher basal insulin clearance.

221

222 After further adjusting for FMI, the associations with fasting glucose, 2-hour glucose, and  
223 insulin sensitivity were no longer significant. In contrast, the significant associations with  
224 basal insulin clearance were maintained when 30 minutes of sitting/lying (0.21 ng/mIU, CI:  
225 0.41–0.02,  $p=0.029$ ) or standing (0.19 ng/mIU, CI: 0.39–0.002,  $p=0.048$ ) were replaced by  
226 MVPA. Replacing 30 minutes of sitting/lying with the same amount of standing was also still  
227 associated with higher beta-cell function (8.68 mIU/mmol, CI: 0.93–16.44,  $p=0.028$ ) after  
228 adjusting for FMI.

229

## 230 **Discussion**

231

232 This study in a middle-aged African population of men and women showed that physical  
233 activity was associated with lower risk for T2DM. Substituting 30 minutes of awake  
234 sitting/lying, standing or LPA with the same amount of time in MVPA in men, was associated  
235 with lower fasting glucose and higher insulin sensitivity, both well-accepted indicators of  
236 T2DM risk. In women just replacing 30 minutes of sitting/lying with the same amount of time  
237 standing was associated with lower fasting glucose and higher insulin sensitivity. We have  
238 also shown that the associations between physical behaviours and these measures of T2DM  
239 risk are mediated by adiposity in both men and women.

240

241 In both men and women our study showed that total movement volume was associated with  
242 lower fasting glucose and higher insulin sensitivity, and in men only was also associated with  
243 lower 2-hr glucose, although none of these associations remained significant after adjusting  
244 for adiposity. Physical activity through its effects on multiple organs and systems is  
245 associated with improved insulin sensitivity and glycaemia (5,36). Data from the EPIC-  
246 InterAct case-control study of incident T2DM reported a significant reduction in the risk of  
247 developing T2DM in men and women who had higher levels of physical activity (37). Indeed,  
248 epidemiological studies have shown that PA reduces the risk of insulin resistance and T2DM  
249 in healthy individuals and appropriate exercise training is an effective intervention for  
250 individuals at risk of T2DM (38,39). Physical activity can reduce the risk of T2DM in men  
251 and women with high body mass index and elevated glucose levels. Even relatively modest

252 exercise can stimulate immediate and persistent insulin sensitivity the next day in adults at  
253 risk of T2DM (40). The men in our study completed on average 410 minutes of MVPA/week  
254 while average MVPA/week in the women was 240 minutes, which may account for the  
255 additional effect of PA on postprandial glucose uptake, with skeletal muscle being the major  
256 site of uptake. Extensive literature has explored the association between objectively measured  
257 physical activity and measures of T2DM risk (4,8,9). Not all of these studies have accounted  
258 for adiposity, while others have found the association to be mediated by adiposity (36), and  
259 still other studies have found the significant association between PA and T2DM remains after  
260 adjusting for adiposity (37,41). The differences in the results may be due to marked  
261 heterogeneity in research designs and assessment of physical behaviours and T2DM risk. In  
262 our study, the associations between PA and T2DM risk in both men and women were  
263 mediated by total adiposity. Balkau et al. reported that objectively measured daily total  
264 activity and the association with insulin sensitivity in healthy adult men and women between  
265 30–60 years remains even after adjusting for overall body mass index or abdominal adiposity  
266 (42).

267  
268 Using the combination of signals from two accelerometers for objective measurement of  
269 physical behaviours, we used isotemporal substitution to account for the displacement of time  
270 in particular behaviours within a 24-hr day (11,14). We showed that replacing sitting/lying  
271 with standing time was only associated with lower 2-hour glucose in the men, while in  
272 women, replacing sitting with the same amount of time standing was associated with  
273 improvements in fasting glucose, insulin sensitivity, insulin clearance and beta-cell function.  
274 This difference when modelling the hypothetical effect of posture change resulting in all



275 aspects of insulin dynamics being affected in women compared to only post-prandial glucose  
276 in men may be due to the higher adiposity in women. An Australian study in men and women  
277 (36-80 years) using the isotemporal substitution approach, showed that replacing sitting with  
278 standing for 2 h/day was associated with 2% lowering of fasting plasma glucose in both men  
279 and women (43). These differences may be accounted for by the vast disparities in adiposity  
280 between men and women in our study compared to the study in Australia.

281  
282 Replacing sedentary time i.e. sitting or standing with movement, irrespective of intensity, has  
283 been associated with a wide array of health benefits. Yates et al., reported that reallocating 30  
284 minutes per day of sedentary time to LPA and MVPA was associated with a 5% and 18%  
285 difference in insulin sensitivity (Matsuda-ISI) in adult men and women of average age 65  
286 years after adjusting for ethnicity, sex, age, medication, social deprivation and BMI (44). In a  
287 South African study, LPA has been shown to be associated with reduced cardiovascular  
288 disease risk (45) and has also been included in the recent WHO recommendations for physical  
289 activity. Interestingly in this study, the only significant associations when replacing sedentary  
290 behaviour with LPA was a decrease in fasting glucose in the women only when replacing  
291 sitting with LPA, and an increase in 2-hour glucose in the men when replacing standing with  
292 LPA. The men and women in this study spent an average of 2 hours a day in LPA, and  
293 previous studies in similar populations has shown that this is largely time spent in incidental  
294 activity or walking for transport rather than leisure time activity which is typically low in  
295 populations from low and middle income countries (18,46). As physical behaviours have been  
296 accurately measured in this study by combining the signals from two accelerometers, it can be

297 concluded time spent in LPA in this population is not sufficient to influence diabetes risk  
298 significantly.

299

300 Time spent in higher intensity physical activity, in many studies described as MVPA, has  
301 been repeatedly shown in the literature to be associated with lower T2DM risk (3,6,47). In  
302 this study replacing sitting/lying, standing and LPA with MVPA was associated with  
303 improvements in the measures of T2DM risk in men including a decrease in fasting glucose  
304 and 2-h glucose, and an increase in insulin sensitivity and beta cell function. In contrast in the  
305 women, replacing sitting/lying, standing and LPA with MVPA was only associated with an  
306 increase in basal insulin clearance. Although we did not specifically examine time spent in  
307 vigorous intensity physical activity, previous research has shown that SA men spend more  
308 time in higher intensity activity than women (48), which may have explained the greater  
309 associations between MVPA and diabetes risk in men than women. Another explanation may  
310 be the ‘legacy effect’ of earlier patterns of activity which have been shown to be higher in  
311 men compared to women throughout adolescence in a longitudinal South African cohort (46),  
312 and which may then result in alterations in muscle physiology and improved cardiorespiratory  
313 fitness that may be maintained into adulthood. This is consistent with the higher levels of  
314 cardiorespiratory fitness in young adult men compared to women from Soweto (48), and  
315 another study from Cape Town that reported very low levels of cardiorespiratory fitness in  
316 young women (45). Indeed, cardiorespiratory fitness, and not objectively measured MVPA,  
317 has previously been associated with higher insulin sensitivity in black African women (45).  
318 Results from an exercise intervention study in black African women with obesity and low  
319 baseline levels of cardiorespiratory fitness demonstrated that 12 weeks of intensive training

320 only resulted in a small improvement in insulin sensitivity with no changes in glycaemia (49).

321 This may be explained by low levels of fitness and high levels of obesity and insulin  
322 resistance in these women (45).

323

324 Another novel finding of the study was the improvement in insulin clearance when replacing  
325 sitting/lying, standing, and LPA, with MVPA, in women only. Previous research has shown  
326 that black South African women have low insulin clearance compared to their European  
327 counterparts, which contributes to their characteristic hyperinsulinemia (50). Further we  
328 showed that women had lower insulin clearance compared to men. It is still unclear if low  
329 insulin clearance and/or the resultant hyperinsulinemia is a compensatory response to low  
330 insulin sensitivity or is the driver of T2D in the Black African women (50). Nonetheless, this  
331 is the first study to show that MVPA is associated with higher insulin clearance, independent  
332 of the effects of adiposity, and that this association is specific to women and not observed in  
333 men. Prospective studies are required to investigate whether an increase in insulin clearance,  
334 and consequently a reduction in hyperinsulinemia, does confer reduced risk from T2D in  
335 black Africans.

336

337 The strengths of this study included the combination of signals from two accelerometers for  
338 objective measurement of physical behaviours. Most studies have used regression analysis to  
339 determine the associations between PA and diabetes risk. Our study used isotemporal  
340 substitution and 30 minutes as this links closely with public health recommendations. These  
341 results highlight the importance of measuring different physical activity behaviours, which are  
342 differentially associated with glycaemia and insulin dynamics. Notably, we included both

343 men and women and showed differences in the relationship between physical activity  
344 behaviours and diabetes risk. The cross-sectional design is a limitation of the study. Self-  
345 reported sleep diaries are prone to recall bias, and social desirability coupled with reporting of  
346 time in bed, rather than sleep duration, may introduce misclassification. However, the  
347 accelerometry adjunct to sleep diaries assisted in verifying the sleep classification.

348  
349 In conclusion, this study provides novel evidence on the potential benefits of engaging in  
350 more active behaviours on risk factors for T2DM in men and women. This is critical in public  
351 health given the high amount of time spent sitting/lying and standing in our study population.  
352 Further intervention research is required to determine whether the effects of different intensity  
353 physical behaviours are sex-specific and need to be taken into account when designing public  
354 health interventions to reduce non-communicable disease risk.

**Funding sources:** The study received funding from the South African Medical Research Council, with funds received from the South African National Department of Health, the Research Councils UK Newton Fund to the University of Cambridge, GSK (Grant no: ES/N013891/1) and the South African National Research Foundation (Grant no: UID:98561) to the University of Witwatersrand. The work of KW, AS and SB were supported by the NIHR Cambridge Biomedical Research Centre (IS-BRC-1215-20014) and the Medical Research Council (MC\_UU\_12015/3, MC\_UU\_00006/4). TC is the recipient of a Wellcome Trust International Training Fellow grant (214205/Z/18/Z).

**Author contributions:** NCK analysed the data. AS and KW processed the physical activity. NCK, JHG, SB and LKM conceived the study and NCK drafted and revised the manuscript under the supervision of JHG, SB and LKM. All authors read and approved the final version of the manuscript.

**Acknowledgements:** We are grateful to the participants as well as the following DPHRU staff for their input during data collection and entry: Tshifiwa Ratshikombo, Vukosi Mkansi, Sphume Thango, Mosadiapula Nakedi, Thabile Sibiya, Bonisiwe. Mlambo, Caroline Makura, Dr Mamosilo Lichaba, and Karabo Pearl Nkhahle and team.

**Competing Interests:** None declared

**Table 1: Body fat distribution and physical behaviours in men and women**

| Characteristic                                | n   | Men (n=403)        | Women (n=324)      | p-value |
|-----------------------------------------------|-----|--------------------|--------------------|---------|
| Age (years)                                   | 727 | 53.3±6.2           | 53.7±5.9           | 0.450   |
| Height (cm)                                   | 727 | 171.1±6.5          | 158.3±6.1          | <0.001  |
| Weight (kg)                                   | 727 | 73.7±17.7          | 83.5±18.8          | <0.001  |
| BMI (kg/m <sup>2</sup> )                      | 727 | 25.2±5.8           | 33.3±7.0           | <0.001  |
| <b>Accelerometry (minutes/day)</b>            |     |                    |                    |         |
| LPA                                           | 727 | 116.5±77.4         | 121.3±49.6         | 0.333   |
| MVPA                                          | 727 | 58.6±42.8          | 34.3±23.2          | <0.001  |
| Sitting/lying                                 | 675 | 645.9±124.0        | 613.9±128.7        | 0.001   |
| Standing                                      | 675 | 197.5±86.7         | 258.1±99.3         | <0.001  |
| Sleep                                         | 727 | 421.0±84.3         | 409.5±75.9         | 0.057   |
| Total movement volume (mg)                    | 727 | 15.1±6.0           | 12.4±3.5           | <0.001  |
| <b>DXA</b>                                    |     |                    |                    |         |
| Fat Mass (FM, kg)                             | 692 | 19.2±8.4           | 36.5±10.7          | <0.001  |
| Fat Mass Index (FMI, kg/m <sup>2</sup> )      | 692 | 6.6±2.9            | 14.6±4.2           | <0.001  |
| VAT (cm <sup>2</sup> )                        | 692 | 83.4±42.8          | 102.7±43.7         | <0.001  |
| SAT (cm <sup>2</sup> )                        | 692 | 194.4±122.0        | 456.9±149.1        | <0.001  |
| <b>Glycaemia and insulin dynamics</b>         |     |                    |                    |         |
| Fasting glucose (mmol/L)                      | 725 | 5.0±1.0            | 5.1±0.9            | 0.692   |
| 2-h glucose (mmol/L)                          | 720 | 5.9±2.5            | 6.3±2.3            | 0.064   |
| Fasting insulin (mIU/ml)                      | 723 | 5.1 (2.1–10.3)     | 8.9 (5.2–14.5)     | <0.001  |
| Fasting C-peptide (ng/ml)                     | 723 | 1.5 (1.1–2.3)      | 1.8 (1.3–2.5)      | <0.001  |
| HOMA-IR                                       | 723 | 1.1 (0.5–2.3)      | 1.9 (1.1–3.4)      | <0.001  |
| Insulin sensitivity (mgI <sup>2</sup> /mUmin) | 719 | 7.5 (4.0–14.0)     | 5.0 (3.1–8.2)      | <0.001  |
| Insulin secretion (ng/mmol)                   | 628 | 2.3 (1.3–3.8)      | 3.1 (1.8–5.1)      | <0.001  |
| Basal insulin clearance (ng/mIU)              | 723 | 0.29 (0.20–0.40)   | 0.20 (0.15–0.26)   | <0.001  |
| Beta-cell function (mIU/mmol)                 | 610 | 107.0 (56.6–195.2) | 138.2 (61.1–251.3) | 0.046   |

Values for DXA, glycaemia and insulin dynamics are mean±standard deviation (SD) or median (25<sup>th</sup> – 75<sup>th</sup>)  
HOMA-IR: Homeostasis model assessment of insulin resistance

**Table 2: Multiple robust regression analyses of total movement volume and measures of glycaemic and insulin dynamics**

| Model 1                                                   | n   | Men           |                          | Women         |                         |
|-----------------------------------------------------------|-----|---------------|--------------------------|---------------|-------------------------|
|                                                           |     | $\beta$       | 95%CI                    | $\beta$       | 95%CI                   |
| Fasting glucose (mmol/L)                                  | 725 | <b>-0.014</b> | <b>-0.028 to -0.003</b>  | <b>-0.031</b> | <b>-0.054 to -0.009</b> |
| 2-h glucose (mmol/L)                                      | 720 | <b>-0.033</b> | <b>-0.063 to -0.002</b>  | -0.052        | -0.109 to 0.004         |
| Insulin sensitivity (mg <sup>l</sup> <sup>2</sup> /mUmin) | 719 | <b>0.240</b>  | <b>0.138 to 0.343</b>    | <b>0.162</b>  | <b>0.049 to 0.275</b>   |
| Basal insulin clearance (ng/mIU)                          | 723 | 0.001         | -0.001 to 0.003          | <b>0.004</b>  | <b>0.002 to 0.006</b>   |
| Beta-cell function (mIU/mmol)                             | 628 | 0.129         | -0.079 to 0.338          | 0.336         | -0.095 to 0.768         |
| <b>Model 2</b>                                            |     |               |                          |               |                         |
| Fasting glucose (mmol/L)                                  | 726 | <b>-0.014</b> | <b>-0.027 to -0.0004</b> | <b>-0.026</b> | <b>-0.050 to -0.002</b> |
| 2-h glucose (mmol/L)                                      | 720 | <b>-0.033</b> | <b>-0.065 to 0.002</b>   | -0.042        | -0.103 to 0.018         |
| Insulin sensitivity (mg <sup>l</sup> <sup>2</sup> /mUmin) | 719 | <b>0.199</b>  | <b>0.096 to 0.301</b>    | <b>0.138</b>  | <b>0.022 to 0.255</b>   |
| Basal insulin clearance (ng/mIU)                          | 723 | 0.001         | -0.002 to 0.003          | <b>0.005</b>  | <b>0.002 to 0.007</b>   |
| Beta-cell function (mIU/mmol)                             | 628 | 0.168         | -0.049 to 0.385          | 0.393         | -0.070 to 0.855         |
| <b>Model 3</b>                                            |     |               |                          |               |                         |
| Fasting glucose (mmol/L)                                  | 690 | -0.006        | -0.019 to 0.008          | -0.019        | -0.041 to 0.008         |
| 2-h glucose (mmol/L)                                      | 685 | -0.007        | -0.038 to 0.025          | -0.011        | -0.073 to 0.050         |
| Insulin sensitivity (mg <sup>l</sup> <sup>2</sup> /mUmin) | 684 | 0.073         | -0.015 to 0.161          | 0.071         | -0.059 to 0.201         |
| Basal insulin clearance (ng/mIU)                          | 688 | -0.001        | -0.003 to 0.002          | <b>0.003</b>  | <b>0.0001 to 0.005</b>  |
| Beta-cell function (mIU/mmol)                             | 599 | -0.006        | -0.227 to 0.215          | 0.306         | -0.194 to 0.807         |
| <b>Model 4</b>                                            |     |               |                          |               |                         |
| Fasting glucose (mmol/L)                                  | 690 | -0.004        | -0.018 to 0.009          | -0.013        | -0.037 to 0.011         |
| 2-h glucose (mmol/L)                                      | 685 | -0.0003       | -0.0311 to 0.0317        | -0.003        | -0.062 to 0.057         |
| Insulin sensitivity (mg <sup>l</sup> <sup>2</sup> /mUmin) | 684 | 0.053         | -0.034 to 0.141          | 0.072         | -0.052 to 0.195         |
| Basal insulin clearance (ng/mIU)                          | 688 | -0.001        | -0.003 to 0.002          | <b>0.003</b>  | <b>0.0001 to 0.005</b>  |
| Beta-cell function (mIU/mmol)                             | 599 | -0.061        | -0.286 to 0.164          | 0.236         | -0.241 to 0.713         |

Beta coefficients represent the difference in the outcomes listed per 1 mg difference in movement volume; bold represents significant associations.

Model 1: included age

Model 2: included age, HIV status, education, asset category and employment,

Model 3: included age, HIV status, education, asset category and employment and FMI,

Model 4: included age, HIV status, education, asset category and employment, FMI and VAT

**Table 3: Associations of reallocating 30 minutes of physical behaviours on glycaemia for men and women**

|                        |               | $\beta$                         | 95%CI                   | $\beta$       | 95%CI                   |
|------------------------|---------------|---------------------------------|-------------------------|---------------|-------------------------|
|                        |               | <b>Fasting glucose (mmol/L)</b> |                         |               |                         |
|                        |               | <b>Men (n=372)</b>              |                         |               | <b>Women(n=301)</b>     |
| From SITTING/LYING to: | SLEEP         | -0.106                          | -0.561 to 0.348         | -0.435        | -0.956 to 0.085         |
|                        | STANDING      | 1.317                           | -0.270 to 0.534         | <b>-0.547</b> | <b>-0.908 to -0.187</b> |
|                        | LPA           | -0.062                          | -0.528 to 0.040         | <b>-0.790</b> | <b>-1.553 to -0.028</b> |
|                        | MVPA          | <b>-1.254</b>                   | <b>-2.148 to -0.359</b> | 0.389         | -1.287 to 2.064         |
| From STANDING to:      | SLEEP         | -0.238                          | -0.810 to 0.333         | 0.112         | -0.458 to 0.681         |
|                        | SITTING/LYING | -0.132                          | -0.534 to 0.270         | <b>0.547</b>  | <b>0.187 to 0.908</b>   |
|                        | LPA           | -0.194                          | -0.781 to 0.392         | -0.242        | -1.114 to 0.629         |
|                        | MVPA          | <b>-1.386</b>                   | <b>-2.338 to -0.433</b> | 0.937         | -0.795 to 2.667         |
| From LPA to:           | SLEEP         | -0.044                          | -0.583 to 0.494         | 0.355         | -0.510 to 1.220         |
|                        | SITTING/LYING | 0.062                           | -0.404 to 0.529         | <b>0.790</b>  | <b>0.028 to 1.553</b>   |
|                        | STANDING      | 0.194                           | -0.392 to 0.781         | 0.242         | -0.629 to 1.114         |
|                        | MVPA          | <b>-1.191</b>                   | <b>-2.243 to -0.139</b> | 1.179         | -0.868 to 3.227         |
| From MPVA to:          | SLEEP         | 1.147                           | 0.177 to 2.117          | -0.824        | -2.620 to 0.971         |
|                        | SITTING/LYING | <b>1.254</b>                    | <b>0.359 to 2.148</b>   | -0.389        | -2.065 to 1.286         |
|                        | STANDING      | <b>1.385</b>                    | <b>0.433 to 2.338</b>   | -0.936        | -2.669 to 0.795         |
|                        | LPA           | <b>1.191</b>                    | <b>0.139 to 2.243</b>   | -1.179        | -3.227 to 0.868         |
|                        |               | <b>2-h glucose (mmol/L)</b>     |                         |               |                         |
|                        |               | <b>Men (n=371)</b>              |                         |               | <b>Women(n=298)</b>     |
| From SITTING/LYING to: | SLEEP         | -1.297                          | -2.325 to -0.269        | -1.198        | -2.253 to 0.126         |
|                        | STANDING      | <b>-1.385</b>                   | <b>-2.293 to -0.476</b> | -0.877        | -1.791 to 0.035         |
|                        | LPA           | 0.199                           | -0.854 to 1.253         | -1.203        | -3.134 to 0.726         |
|                        | MVPA          | <b>-3.261</b>                   | <b>-5.289 to -1.232</b> | 1.102         | -3.147 to 5.349         |
| From STANDING to:      | SLEEP         | 0.087                           | -1.204 to 1.380         | -0.320        | -1.768 to 1.127         |
|                        | SITTING/LYING | <b>1.385</b>                    | <b>0.476 to 2.293</b>   | 0.877         | -0.035 to 1.791         |
|                        | LPA           | <b>1.584</b>                    | <b>0.259 to 2.909</b>   | -0.325        | -2.534 to 1.882         |
|                        | MVPA          | -1.875                          | -4.033 to 0.282         | 1.980         | -2.415 to 6.376         |
| From LPA to:           | SLEEP         | -1.496                          | -2.838 to -0.279        | 0.005         | -2.190 to 2.201         |
|                        | SITTING/LYING | -0.199                          | -1.253 to 0.854         | 1.203         | -0.726 to 3.134         |
|                        | STANDING      | <b>-1.584</b>                   | <b>-2.909 to -0.259</b> | 0.325         | -1.882 to 2.534         |
|                        | MVPA          | <b>-3.460</b>                   | <b>-5.845 to -1.075</b> | 2.306         | -2.882 to 7.494         |
| From MVPA to:          | SLEEP         | 1.963                           | -0.237 to 4.165         | -2.300        | -6.864 to 2.262         |
|                        | SITTING/LYING | <b>3.261</b>                    | <b>1.232 to 5.289</b>   | -1.102        | -5.351 to 3.147         |
|                        | STANDING      | 1.875                           | -0.282 to 4.033         | -1.980        | -6.376 to 2.415         |
|                        | LPA           | <b>3.460</b>                    | <b>1.075 to 5.845</b>   | -2.306        | -7.494 to 2.882         |

Models are adjusted for age, HIV status, education, asset category and employment; bold represents significant associations.



**Table 4: Associations of reallocating 30 minutes of physical behaviours on insulin dynamics for men and women**

|                                                   |               | $\beta$        | 95%CI                    | $\beta$       | 95%CI                   |
|---------------------------------------------------|---------------|----------------|--------------------------|---------------|-------------------------|
| <b>Insulin Sensitivity (mg<sup>2</sup>/mUmin)</b> |               |                | <b>Men (n=371)</b>       |               | <b>Women (n=297)</b>    |
| From SITTING/LYING to:                            | SLEEP         | 2.507          | -0.988 to 6.003          | -0.986        | -3.631 to 1.658         |
|                                                   | STANDING      | -0.685         | -3.775 to 2.403          | <b>3.229</b>  | <b>1.404 to 5.054</b>   |
|                                                   | LPA           | 0.366          | -3.217 to 3.951          | -0.054        | -3.907 to 3.798         |
|                                                   | MVPA          | <b>12.714</b>  | <b>5.819 to 19.610</b>   | 6.866         | -1.612 to 15.345        |
| From STANDING to:                                 | SLEEP         | 3.193          | -1.201 to 7.587          | -4.216        | -7.105 to -1.326        |
|                                                   | SITTING/LYING | 0.685          | -2.403 to 3.775          | <b>-3.229</b> | <b>-5.054 to -1.404</b> |
|                                                   | LPA           | 1.052          | -3.452 to 5.557          | -3.284        | -7.692 to 1.124         |
|                                                   | MVPA          | <b>13.400</b>  | <b>6.063 to 20.738</b>   | 3.636         | -5.136 to 12.409        |
| From LPA to:                                      | SLEEP         | 2.140          | -1.997 to 6.279          | -0.932        | -5.316 to 3.452         |
|                                                   | SITTING/LYING | -0.366         | -3.951 to 3.217          | 0.054         | -3.798 to 3.907         |
|                                                   | STAND         | -1.052         | -5.557 to 3.452          | 3.284         | -1.124 to 7.692         |
|                                                   | MVPA          | <b>12.348</b>  | <b>4.239 to 20.457</b>   | 6.920         | 3.431 to 17.272         |
| From MVPA to:                                     | SLEEP         | -10.207        | -17.691 to -2.722        | -7.852        | -16.960 to 1.254        |
|                                                   | SITTING/LYING | <b>-12.714</b> | <b>-19.610 to -5.818</b> | -6.866        | -15.345 to 1.612        |
|                                                   | STANDING      | <b>-13.400</b> | <b>-20.738 to -6.063</b> | -3.636        | -12.409 to 5.136        |
|                                                   | LPA           | <b>-12.348</b> | <b>-20.457 to -4.239</b> | -6.920        | -17.272 to 3.431        |
| <b>Basal Insulin Clearance (ng/mIU)</b>           |               |                | <b>Men (n=371)</b>       |               | <b>Women (n=300)</b>    |
| From SITTING to:                                  | SLEEP         | 0.030          | -0.052 to 0.113          | -0.009        | -0.070 to 0.051         |
|                                                   | STANDING      | -0.003         | -0.077 to 0.069          | <b>0.048</b>  | <b>0.006 to 0.090</b>   |
|                                                   | LPA           | 0.008          | -0.076 to 0.093          | 0.014         | -0.074 to 0.104         |
|                                                   | MVPA          | 0.026          | -0.137 to 0.190          | <b>0.298</b>  | <b>0.101 to 0.495</b>   |
| From STANDING to:                                 | SLEEP         | 0.034          | -0.069 to 0.138          | -0.058        | -0.125 to 0.008         |
|                                                   | SITTING/LYING | 0.003          | -0.069 to 0.077          | <b>-0.048</b> | <b>-0.090 to -0.006</b> |
|                                                   | LPA           | 0.012          | -0.094 to 0.119          | -0.033        | -0.136 to 0.068         |
|                                                   | MVPA          | 0.030          | -0.143 to 0.204          | <b>0.250</b>  | <b>0.046 to 0.453</b>   |
| From LPA to:                                      | SLEEP         | 0.022          | -0.076 to 0.120          | -0.024        | -0.126 to 0.077         |
|                                                   | SITTING/LYING | -0.008         | -0.093 to 0.076          | -0.014        | -0.104 to 0.074         |
|                                                   | STANDING      | -0.123         | -0.119 to 0.094          | 0.033         | -0.068 to 0.136         |
|                                                   | MVPA          | 0.018          | -0.174 to 0.210          | <b>0.284</b>  | <b>0.043 to 0.524</b>   |
| From MVPA to:                                     | SLEEP         | 0.004          | -0.173 to 0.181          | -0.308        | -0.519 to -0.097        |
|                                                   | SITTING/LYING | -0.026         | -0.190 to 0.137          | <b>-0.298</b> | <b>-0.495 to -0.101</b> |
|                                                   | STANDING      | -0.030         | -0.204 to 0.143          | <b>-0.250</b> | <b>-0.453 to -0.046</b> |
|                                                   | LPA           | -0.018         | -0.210 to 0.174          | <b>-0.284</b> | <b>-0.524 to -0.043</b> |
| <b>Beta-cell function (mIU/mmol)</b>              |               |                | <b>Men (n=329)</b>       |               | <b>Women (n=256)</b>    |
| From SITTING/LYING to:                            | SLEEP         | 3.505          | -3.687 to 10.698         | -1.843        | -11.917 to 8.231        |

|                   |               |                |                          |                |                          |
|-------------------|---------------|----------------|--------------------------|----------------|--------------------------|
|                   | STANDING      | 3.827          | -2.535 to 10.191         | <b>11.304</b>  | <b>4.210 to 18.397</b>   |
|                   | LPA           | -2.088         | -9.269 to 5.091          | 2.960          | -12.031 to 17.951        |
|                   | MVPA          | <b>16.996</b>  | <b>2.886 to 31.104</b>   | 8.607          | -23.341 to 40.556        |
| From STANDING to: | SLEEP         | 0.322          | -9.519 to 8.874          | -13.147        | -24.246 to -2.048        |
|                   | SITTING/LYING | -3.827         | -10.191 to 2.535         | <b>-11.304</b> | <b>-18.397 to -4.210</b> |
|                   | LPA           | -5.915         | -15.069 to 3.237         | -8.343         | -25.643 to 8.955         |
|                   | MVPA          | 13.168         | -1.790 to 28.127         | -2.696         | -35.778 to 30.384        |
| From LPA to:      | SLEEP         | 5.593          | -2.715 to 13.903         | -4.803         | -21.936 to 12.329        |
|                   | SITTING/LYING | 2.088          | -5.093 to 9.269          | -2.960         | -17.951 to 12.031        |
|                   | STANDING      | 5.915          | -3.237 to 15.069         | 8.343          | -8.955 to 25.643         |
|                   | MVPA          | <b>19.084</b>  | <b>2.562 to 35.606</b>   | -5.647         | -33.324 to 44.618        |
| From MVPA to:     | SLEEP         | -13.491        | -28.962 to 1.980         | -10.450        | -44.714 to 23.813        |
|                   | SITTING/LYING | <b>-16.996</b> | <b>-31.106 to -2.886</b> | -8.607         | -40.556 to 23.341        |
|                   | STANDING      | -13.168        | -28.127 to 1.790         | 2.696          | -30.384 to 35.778        |
|                   | LPA           | <b>-19.084</b> | <b>-35.606 to -2.562</b> | -5.647         | -44.618 to 33.324        |

Models adjusted for age, HIV status, education, asset category and employment

## References

1. IDF. Diabetes Atlas, 10th Edition 2021. Brussels; 2021.
2. NDoH, Stats SA S& I. South Africa Demographic and Health Survey 2016. Pretoria; 2019.
3. Smith AD, Crippa A, Woodcock J, Brage S. Physical activity and incident type 2 diabetes mellitus: a systematic review and dose–response meta-analysis of prospective cohort studies. *Diabetologia*. 2016;59(12):2527–45.
4. Aune D, Norat T, Leitzmann M, Tonstad S, Vatten LJ. Physical activity and the risk of type 2 diabetes: A systematic review and dose-response meta-analysis. *Eur J Epidemiol*. 2015;30(7):529–42.
5. Lavie CJ, Johannsen N, Swift D, Sénéchal M, Earnest C, Church T, et al. Exercise is medicine - the importance of physical activity, exercise training, cardiorespiratory fitness and obesity in the prevention and treatment of type 2 diabetes. *Eur Endocrinol*. 2014;10(1):18–22.
6. Jelleyman C, Edwardson CL, Henson J, Gray LJ, Rowlands A V., Khunti K, et al. Associations of Physical Activity Intensities with Markers of Insulin Sensitivity. *Med Sci Sports Exerc*. 2017;49(12):2451–8.
7. Bird SR, Hawley JA. Update on the effects of physical activity on insulin sensitivity in humans. Vol. 2, *BMJ Open Sport and Exercise Medicine*. 2017. p. 1–26.
8. Wilmot EG, Edwardson CL, Achana FA, Davies MJ, Gorely T, Gray LJ, et al. Sedentary time in adults and the association with diabetes, cardiovascular disease and death: Systematic review and meta-analysis. *Diabetologia*. 2012;55(11):2895–905.
9. Biswas A, Oh PI, Faulkner GE, Bajaj RR, Silver MA, Mitchell MS, et al. Sedentary time and its association with risk for disease incidence, mortality, and hospitalization in adults a systematic review and meta-analysis. Vol. 162, *Annals of Internal Medicine*. 2015. p. 123–32.
10. Patterson R, McNamara E, Tainio M, de Sá TH, Smith AD, Sharp SJ, et al. Sedentary behaviour and risk of all-cause, cardiovascular and cancer mortality, and incident type 2 diabetes: a systematic review and dose response meta-analysis. *Eur J Epidemiol*. 2018;33(9):811–29.
11. Mekary RA, Willett WC, Hu FB, Ding EL. Isotemporal substitution paradigm for physical activity epidemiology and weight change. *Am J Epidemiol*. 2009;170(4):519–27.
12. del Pozo-Cruz J, García-Hermoso A, Alfonso-Rosa RM, Alvarez-Barbosa F, Owen N, Chastin S, et al. Replacing Sedentary Time: Meta-analysis of Objective-Assessment Studies. *Am J Prev Med*. 2018;55(3):395–402.
13. Xiang Li, Tao Zhou, Hao Ma, Zhaoxia Liang, Vivian A Fonseca LQ. Replacement of Sedentary Behavior by Various Daily-Life Physical Activities and Structured Exercises: Genetic Risk and Incident Type 2 Diabetes. *Diabetes Care*. 2021;
14. Mekary RA, Ding EL. Isotemporal substitution as the gold standard model for physical activity epidemiology: Why it is the most appropriate for activity time research. *Int J Environ Res Public Health*. 2019;16(5):11–3.
15. Mlangeni L, Makola L, Naidoo I, Chibi B, Sokhela Z, Silimfe Z, et al. Factors Associated with Physical Activity in South Africa: Evidence from a National Population Based Survey. *Open Public Health J*. 2018;11(1):516–25.
16. Dickie K, Micklesfield LK, Chantler S, Lambert E V, Goedecke JH. Meeting physical activity guidelines is associated with reduced risk for cardiovascular disease in black South African women; a 5.5-year follow-up study. *BMC Public Health*. 2014;14(1):498.
17. Chantler S, Dickie K, Micklesfield LK, Goedecke JH. Determinants of change in body weight and body fat distribution over 5.5 years in a sample of free-living black South African women. *Cardiovasc J Afr*. 2016;27(6):367–74.
18. Gradidge PJ-L, Crowther NJ, Chirwa ED, Norris S a, Micklesfield LK. Patterns, levels and correlates of

- self-reported physical activity in urban black Soweto women. *BMC Public Health*. 2014;14(1):934.
19. Coetzee A, Beukes A, Dreyer R, Solomon S, van Wyk L, Mistry R, et al. The prevalence and risk factors for diabetes mellitus in healthcare workers at Tygerberg hospital, Cape Town, South Africa: a retrospective study. *J Endocrinol Metab Diabetes South Africa*. 2019;24(3):77–82.
  20. Adedokun AO, Ter Goon D, Owolabi EO, Adeniyi OV, Ajayi AI. Prevalence, awareness, and determinants of type 2 diabetes mellitus among commercial taxi drivers in buffalo city metropolitan municipality South Africa: A cross-sectional survey. *Medicine (Baltimore)*. 2019;98(9):e14652.
  21. Mutyambizi C, Booysen F, Stokes A, Pavlova M, Groot W. Lifestyle and socio-economic inequalities in diabetes prevalence in South Africa: A decomposition analysis. *PLoS One*. 2019;14(1):1–21.
  22. Dowd KP, Szeklicki R, Minetto MA, Murphy MH, Polito A, Ghigo E, et al. A systematic literature review of reviews on techniques for physical activity measurement in adults: A DEDIPAC study. Vol. 15, *International Journal of Behavioral Nutrition and Physical Activity*. *International Journal of Behavioral Nutrition and Physical Activity*; 2018. 1–33 p.
  23. Sasai H. Assessing sedentary behavior using wearable devices: An overview and future directions. *J Phys Fit Sport Med*. 2017;6(3):135–43.
  24. Rosenberger ME, Buman MP, Haskell WL, McConnell M V., Carstensen LL. Twenty-four Hours of Sleep, Sedentary Behavior, and Physical Activity with Nine Wearable Devices. *Med Sci Sports Exerc*. 2016;48(3):457–65.
  25. Edwardson CL, Rowlands A V., Bunnewell S, Sanders J, Esliger DW, Gorely T, et al. Accuracy of posture allocation algorithms for thigh- and waist-worn accelerometers. *Med Sci Sports Exerc*. 2016;48(6):1085–90.
  26. Clement N. Kufe, Lisa K. Micklesfield, Maphoko Masemola, Tinashe Chikowore, Andre Pascal Kengne, Fredrik Karpe, Shane A. Norris, Nigel J. Crowther, Tommy Olsson JHG. Increased Risk for Type 2 Diabetes in Relation to Adiposity in Middle-Aged Black South African Men compared to Women. medRxiv. 2021;medRxiv 20.
  27. Lisa K. Micklesfield, Kate Westgate, Antonia Smith, Clement Kufe, Amy E. Mendham, Tim Lindsay, Katrien Wijndaele, Julia H. Goedecke SB. Physical activity and posture profile of a South African cohort of middle-aged men and women as determined by integrated hip and thigh accelerometry. 2 3. medRxiv. 2021;medRxiv 20.
  28. Thomite/pampro. Thomite/pampro v0.4.0, Zenodo. Zenodo; 2018.
  29. Van Hees VT, Fang Z, Langford J, Assah F, Mohammad A, Da Silva ICM, et al. Autocalibration of accelerometer data for free-living physical activity assessment using local gravity and temperature: An evaluation on four continents. *J Appl Physiol*. 2014;117(7):738–44.
  30. Matthews DR, Hosker JP, Rudenski AS, Naylor BA, Treacher DF, Turner RC. Homeostasis model assessment: insulin resistance and  $\beta$ -cell function from fasting plasma glucose and insulin concentrations in man. *Diabetologia*. 1985;28(7):412–9.
  31. Matsuda M, DeFronzo RA. Insulin sensitivity indices obtained from oral glucose tolerance testing: Comparison with the euglycemic insulin clamp. *Diabetes Care*. 1999;22(9):1462–70.
  32. DeFronzo RA, Matsuda M. Reduced time points to calculate the composite index. Vol. 33, *Diabetes Care*. 2010. p. 2010.
  33. Tura A, Kautzky-Willer A, Pacini G. Insulinogenic indices from insulin and C-peptide: Comparison of beta-cell function from OGTT and IVGTT. *Diabetes Res Clin Pract*. 2006;72(3):298–301.
  34. Harris PA, Taylor R, Thielke R, Payne J, Gonzalez N, Conde JG. Research Electronic Data Capture (REDCap) - A metadata-driven methodology and workflow process for providing translational research informatics support. *J Biomed Inf*. 2009;42(2):377–81.
  35. Micklesfield LK, Goedecke JH, Punyanitya M, Wilson KE, Kelly TL. Dual-Energy X-Ray Performs as

- Well as Clinical Computed Tomography for the Measurement of Visceral Fat. *Obesity*. 2012;20(5):1109–14.
36. Goedecke JH, Micklesfield LK. The effect of exercise on obesity, body fat distribution and risk for type 2 diabetes. *Med Sport Sci*. 2014;60(September):82–93.
  37. InterAct Consortium, Ekelund U, Palla L, Brage S, Franks PW, Peters T, Balkau B, Diaz MJ, Huerta JM, Agnoli C, Arriola L, Ardanaz E, Boeing H, Clavel-Chapelon F, Crowe F, Fagherazzi G, Groop L, Føns Johnsen N, Kaaks R, Khaw KT, Key TJ, de Lauzon-Guillain WN. Physical activity reduces the risk of incident type 2 diabetes in general and in abdominally lean and obese men and women: The EPIC-InterAct study. *Diabetologia*. 2012;55(7):1944–52.
  38. Eriksson KF, Lindgärde F. Prevention of Type 2 (non-insulin-dependent) diabetes mellitus by diet and physical exercise The 6-year Malmö feasibility study. *Diabetologia*. 1991;34(12):891–8.
  39. Manson JE, Stampfer MJ, Colditz GA, Willett WC, Rosner B, Hennekens CH, et al. Physical activity and incidence of non-insulin-dependent diabetes mellitus in women. *Lancet*. 1991;338(8770):774–8.
  40. Newsom SA, Everett AC, Hinko A, Horowitz JF. A single session of low-intensity exercise is sufficient to enhance insulin sensitivity into the next day in obese adults. *Diabetes Care*. 2013;36(9):2516–22.
  41. Ponsonby AL, Sun C, Ukoumunne OC, Pezic A, Venn A, Shaw JE, et al. Objectively measured physical activity and the subsequent risk of incident dysglycemia: The Australian diabetes, obesity and lifestyle Study (AusDiab). *Diabetes Care*. 2011;34(7):1497–502.
  42. Balkau B, Mhamdi L, Oppert JM, Nolan J, Golay A, Porcellati F, et al. Physical activity and insulin sensitivity the RISC study. *Diabetes*. 2008;57(10):2613–8.
  43. Healy GN, Winkler EAH, Owen N, Anuradha S, Dunstan DW. Replacing sitting time with standing or stepping: Associations with cardio-metabolic risk biomarkers. *Eur Heart J*. 2015;36(39):2643–9.
  44. Yates T, Henson J, Edwardson C, Dunstan D, Bodicoat DH, Khunti K, et al. Objectively measured sedentary time and associations with insulin sensitivity: Importance of reallocating sedentary time to physical activity. *Prev Med (Baltim)*. 2015;76:79–83.
  45. Dickie K, Micklesfield LK, Chantler S, Lambert E V., Goedecke JH. Cardiorespiratory Fitness and Light-Intensity Physical Activity Are Independently Associated with Reduced Cardiovascular Disease Risk in Urban Black South African Women: A Cross-Sectional Study. *Metab Syndr Relat Disord*. 2016;14(1):23–32.
  46. Hanson SK, Munthali RJ, Micklesfield LK, Lobelo F, Cunningham SA, Hartman TJ, et al. Longitudinal patterns of physical activity, sedentary behavior and sleep in urban South African adolescents, Birth-To-Twenty Plus cohort. *BMC Pediatr*. 2019;19(1):241.
  47. Llaveró-Valero M, Escalada-San Martín J, Martínez-González MA, Basterra-Gortari FJ, Gea A, Bes-Rastrollo M. Physical Activity Intensity and Type 2 Diabetes: Isotemporal Substitution Models in the “Seguimiento Universidad de Navarra” (SUN) Cohort. *J Clin Med*. 2021;10(13):2744.
  48. Pioreschi A, Brage S, Westgate K, Norris SA, Micklesfield LK. Cardiorespiratory fitness levels and associations with physical activity and body composition in young South African adults from Soweto. *BMC Public Health*. 2017;17(1):1–8.
  49. Fortuin-De Smidt MC, Mendham AE, Hauksson J, Hakim O, Stefanovski D, Clamp L, et al. Effect of exercise training on insulin sensitivity, hyperinsulinemia and ectopic fat in black South African women: A randomized controlled trial. *Eur J Endocrinol*. 2020;183(1):51–61.
  50. Goedecke JH, Olsson T. Pathogenesis of type 2 diabetes risk in black Africans: a South African perspective. *J Intern Med*. 2020;1–11.

**SUPPLEMENTARY FILES:**

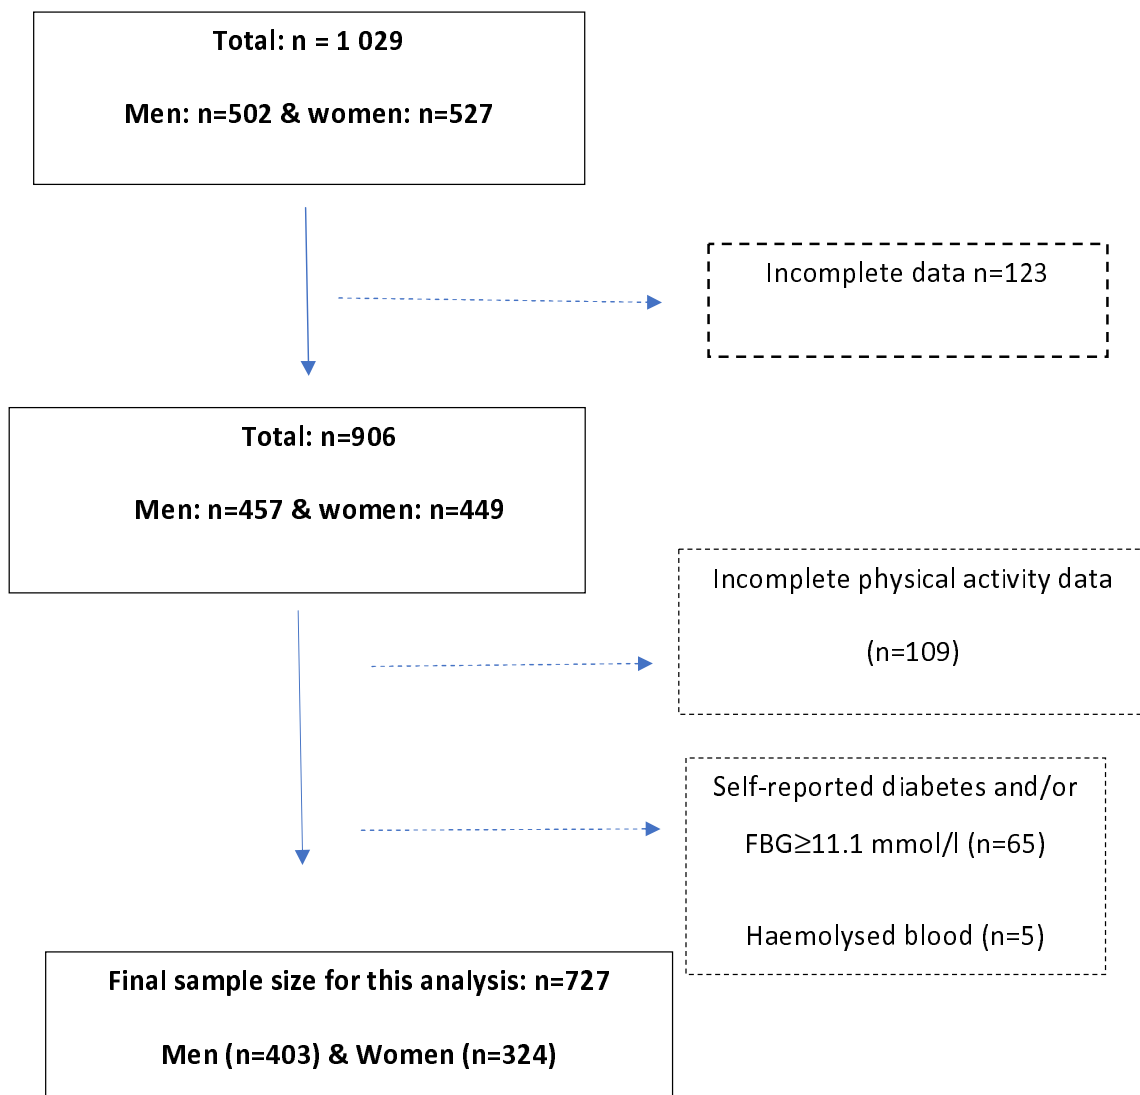

**Figure 1: Sample selection flow chart**
